# 1 Transition from leg to wing forces during take-off in birds

2

3 Pauline Provini<sup>1,2</sup>; Bret W. Tobalske<sup>3</sup>; Kristen E. Crandell<sup>3</sup>; Anick Abourachid<sup>1</sup>

4 <sup>1</sup>Muséum National d'Histoire Naturelle, EGB, UMR 7179, 55 rue Buffon 75005 Paris, France

5 <sup>2</sup>Université Paris Descartes, 12 rue de l'Ecole de Médecine 75270 Paris, France

6 <sup>3</sup>Field Research Station at Fort Missoula, Division of Biological Sciences, University of

7 Montana, Missoula, MT 59812, USA

8

9 Corresponding Author: P. Provini

10 Email: provini@mnhn.fr

11 Telephone: 33-1-40795714

12

## 13 Summary

14 Take-off mechanics are fundamental to the ecology and evolution of flying animals. Recent  
 15 research reveals that initial take-off velocity in birds is driven mostly by hindlimbs forces.

16 However, the contribution of the wings during the transition to air is unknown. To investigate  
 17 this transition, we integrated measures of both leg and wing forces during take-off and the  
 18 first three wingbeats in zebra finch (*Taeniopygia guttata*, 15g, N=7) and diamond dove  
 19 (*Geopelia cuneata*, 50g, N=3). We measured ground-reaction forces produced by the

20 hindlimbs using a perch mounted on a force-plate, whole body and wing kinematics using  
 21 high-speed video, and aerodynamic forces using particle image velocimetry (PIV). Take-off  
 22 performance was generally similar between species. When birds were perched, an  
 23 acceleration peak produced by the legs contributed to 85±1% of the whole body resultant  
 24 acceleration in finch and 77±6% in dove. At lift-off, coincident with the start of the first  
 25 downstroke, the percentage of hindlimb contribution to initial flight velocity was 93.6±0.6%

26 in finch and  $95.2 \pm 0.4\%$  in dove. In finch, the first wingbeat produced  $57.9 \pm 3.4\%$  of the lift  
27 created during subsequent wingbeats compared to  $62.5 \pm 2.2\%$  in dove. Advance ratios were  $<$   
28  $0.5$  in both species, even when taking self-convection of shed vortices into account, so it was  
29 likely that wing-wake interactions dominated aerodynamics during wingbeats 2 and 3. These  
30 results underscore the relatively low contribution of the wings to initial take-off, and reveal a  
31 novel transitional role for the first wingbeat in terms of force production.

32

33

34

35 **Key-words:**

36 Zebra finch (*Taeniopygia guttata*)

37 Diamond dove (*Geopelia cuneata*)

38 Force

39 Take-off

40 Hindlimb

41 Forelimb

42 Velocity

43 Acceleration

44 Particle image velocimetry (PIV)

45

46 **Introduction**

47 Take-off initiates flight, and so plays a prominent role in the biology of flying birds.  
48 In living birds, take-off has an important function in predator-prey interactions, foraging, mate  
49 finding, and many other ecologically pertinent tasks. In addition, take-off was also a key  
50 component of the evolutionary origin of flight. Indeed, among the three main hypotheses  
51 proposed for the origin of flight in birds a transition between the substrate and the air is  
52 necessary before any possible kind of flight is accomplished, regardless of the substrate from  
53 which take-off takes place. These include the traditional “arboreal versus cursorial” origins,  
54 (Ostrom, 1974; Padian, 1987), and an alternative hypothesis involving wing assisted incline  
55 running (Dial, 2003). Thus, the debate about the origin of flight is closely linked to the ability  
56 to perform an effective take-off, and thus also to the contributions and coordination of the  
57 forelimbs and hindlimbs during this phase.

58 To date, only a small number of studies have focused on the mechanics of take-off in  
59 extant birds (Simpson, 1983; Heppner and Anderson, 1985; Dial and Biewener, 1993b;  
60 Bonser and Rayner, 1996; Tobalske et al., 2004; Berg and Biewener, 2010) and even fewer  
61 have done so in the context of the origin of avian flight (Gatesy and Dial, 1993; Earls, 2000;  
62 Dial et al., 2008). Furthermore, the majority of studies that have explored take-off in extant  
63 birds have either emphasized aerial performance and consequently focused on the use of  
64 wings during take-off (Norberg and Norberg, 1971; Simpson, 1983; Heppner and Anderson,  
65 1985; Tobalske and Dial, 2000; Askew, 2001; Berg and Biewener, 2010) or have focused on  
66 the legs exclusively (Heppner and Anderson, 1985; Bonser and Rayner, 1996).

67 Only two studies have considered both locomotor systems during take-off (Earls,  
68 2000; Tobalske et al., 2004). Kinematic and force plate analyses of birds with very different  
69 body shape and ecology (European starling (*Sturnus vulgaris*); Japanese quail (*Coturnix*  
70 *coturnix*) and rufous hummingbird (*Selasphorus rufus*), reveal that the hindlimbs rather than

71 the forelimbs are the primary accelerators during take-off. Because these prior studies have  
72 shown that the hindlimbs dominate, our effort in the present study is to compare in greater  
73 detail the relative contributions of legs and wings to take-off performance. Here, we directly  
74 measure the contribution to force production of both legs and wings to gain an understanding  
75 of the interaction between legs and wings in reference to timing and aerodynamic forces.

76 We chose two species for our investigation: zebra finch (*Taeniopygia guttata*) and  
77 diamond dove (*Geopelia cuneata*) because of their dissimilar wing shapes and upstroke  
78 kinematics. Zebra finches are passerine birds with rounded wings of low aspect ratio. They  
79 present a highly flexed posture during upstroke, commonly named a “feathered” upstroke  
80 (Tobalske et al., 1999; Tobalske et al., 2003). In contrast, diamond doves are columbids, have  
81 a pointed, high aspect-ratio wing, and use a “tip-reversal” upstroke during slow flight  
82 (Tobalske et al., 2003). We hypothesized this variation in wing kinematics may be crucial, as  
83 positioning the wings during the first upstroke appears to play a prominent role in the initial  
84 phase of take-off. Tip-reversal upstroke may enhance aerodynamic force production at this  
85 critical phase, even prior to the first downstroke. Indeed, it has been found that wings of birds  
86 using a tip-reversal upstroke (as pigeons, rock dove, *Columba livia*) are capable of producing  
87 substantial aerodynamic forces in the upstroke posture (Crandell and Tobalske, 2011).  
88 Moreover, pigeons can generate aerodynamic forces during tip-reversal upstroke in low speed  
89 turns (Ros et al., 2011).

90 We combined kinematic and dynamic analyses with particle image velocimetry (PIV)  
91 focusing on the first three wingbeats after lift-off. Previous analysis of starling and quail  
92 (Earls, 2000) measured take-off from a flat platform, which may heavily influence  
93 aerodynamic performance via complex interactions with the ground (Doligalski et al., 1994;  
94 Han and Cho, 2005). Thus our recordings were performed for a take-off from a perch. Our

95 novel exploration of aerodynamic performance will allow us to provide a more  
96 comprehensive understanding of the transition from terrestrial to aerial forces during take-off.

97

## 98 **Materials and Methods**

### 99 *Animals*

100 Seven zebra finch (*Taeniopygia guttata*;  $15.4 \pm 1.8$ g, mean body mass ( $m$ )  $\pm$  s.d.) and  
101 three diamond dove (*Geopelia cuneata*;  $51.0 \pm 5.1$ g,) were purchased from commercial dealers,  
102 housed in flight cages, and provided with food and water *ad libitum*. Kinematics and force  
103 data collection were performed at the Muséum National d'Histoire Naturelle in Paris for three  
104 of the seven zebra finches. Kinematics, force and particle image velocimetry (PIV) data  
105 collection were performed at the Field Research Station in Missoula, Montana, USA, for four  
106 zebra finch and all three diamond dove. The animals were trained to take-off from a perch at a  
107 climb angle of  $\sim 45$  degrees. All care and experimental procedures were approved by the  
108 University of Montana IACUC. We obtained morphometrics of these animals using standard  
109 techniques with the wings spread as in mid-downstroke (Tobalske et al., 2004) (Table 1).  
110 Herein, we report single wing length (cm), body width between the wings (cm), single wing  
111 projected surface area (cm<sup>2</sup>), average wing chord (calculated as the width of the wing at one  
112 third away from shoulder; cm), aspect ratio (wing span divided by average wing chord,  
113 dimensionless) and tarsometatarsus length (cm).

114

### 115 *Kinematics*

116 In Paris, four digital high-speed video cameras (AVT Pike F-032B, Alliance Vision  
117 Technologies, Stadtroda, Germany) were positioned around the perch and take-offs were  
118 recorded at 200 Hz with a shutter speed of 300 $\mu$ s. The cameras were set in lateral, dorsal,  
119 oblique-frontal and frontal views and the overlapping fields of view of the cameras enabled a

three-dimensional reconstruction of the bird's movements during take-off, as well as during three complete wingbeat cycles after take-off. A checkerboard composed of 81 squares of 10mm×10mm was used to calibrate the cameras and scale the images. A MatLab (R2011b, Mathworks, Inc., Natick, MA, USA) custom M-file (Loco 3.3, Paul-Antoine Libourel MNHN) was used to extract the edge of the animal (head, tail and wings excluded) and calculate the coordinates of the centre of gravity from this shape (Fig. S1). The tip of the 9<sup>th</sup> primary of the left wing was digitized for the same trials. The digitization provided four sets of 2D coordinates for the centre of gravity and for the tip of the wing, used to calculate the 3D coordinates with a direct linear transform (DLT) routine (Hartley and Sturm, 1997). In Missoula, methods were similar, but we used four synchronized cameras, recording at 500 Hz and with a shutter speed of 143  $\mu$ s. These included two Photron 1024 PCI (Photron, Inc., San Diego, CA, USA), one Photron SA-3, and one Phantom MiroEx4 (Vision Research Inc., Wayne, NJ, USA). The reconstruction of the centre of gravity of the shape formed by the edge of the bird was used as a proxy for the bird's centre of mass. A calculation of the actual centre of mass position using the multiple suspension method (Abourachid, 1993) for three zebra finches revealed that this centre of mass approximation was satisfactory: distance between the centre of gravity of the edge of the shape and the actual centre of mass: 6.4 mm  $\pm$  3.9, less than 7% of total length of the bird and less than 15% of maximal body width of the bird (Fig. S1). As birds flew within a vertical plane, approximately perpendicular to the perch, this point was used to calculate the two-dimensional trajectory of the animal (Fig. S2).

The trajectory of the animals was imposed by perch placement, set 0.75 m apart and inclined so that a line connecting the perches would be at 45 degrees above horizontal. Otherwise, the chosen flight path was not constrained, and variability of both the trajectory and body angle was relatively small. The mean magnitude of absolute deviations from the trajectory was 6.7 $\pm$ 3.2 cm and varied from zero to 13.5 $\pm$ 3.3 cm for zebra finch. In diamond

145 dove, the mean magnitude of absolute deviations from the trajectory was  $5.4 \pm 3.6$  cm and  
 146 varied from zero to  $10.9 \pm 3.8$  cm. Body orientation was  $16 \pm 5$  degrees from horizontal for the  
 147 zebra finch and  $21 \pm 4$  degrees for diamond dove (Fig. S2).

148 The component and resultant velocities ( $\text{m.s}^{-1}$ ) and accelerations ( $\text{m.s}^{-2}$ ) were  
 149 calculated as the first and second derivatives of the trajectory, respectively. A MatLab  
 150 (R2011b, The Mathworks, Inc., Natick, MA, USA) script allowed the reconstruction of the  
 151 global orientation of the digitized shape, which was used to calculate the body angle (in  
 152 degrees), corresponding to the angle between the body and the horizontal (Fig. S2).

153 The vertical trajectory of the tip of the 9<sup>th</sup> primary was used to define flight phases as  
 154 it describes a succession of local maxima and minima that match upstroke/downstroke  
 155 transition (USDS) and downstroke/upstroke transition (DSUS), respectively. The average of  
 156 the wingbeat duration was calculated at different take-off phases. The beginning of the first  
 157 upstroke was extracted (FW, “first use of the wings”) as well as Lift-off (LO) corresponding  
 158 to the last touch of the perch by the toes.

159 In our analysis, take-off was divided into four phases (Fig. 1E): 1) start take-off ( $t_0$ )  
 160 when the bird is motionless on the perch, with folded wings and initiates counter movement,  
 161 2) wing and leg extension when the bird is still on the perch, 3) first downstroke and foot  
 162 loses contact with perch (lift off, *LO*), 4) subsequent wingbeats with leg retraction against the  
 163 body.

164 We calculated resultant acceleration using kinematic data ( $\dot{V}_{RK}$ ), with gravitational  
 165 acceleration ( $g, 9.8 \text{ m s}^{-2}$ ) added to the vertical kinematic component ( $\dot{V}_{ZK}$ ):

$$166 \quad \dot{V}_{RK} = \sqrt{\dot{V}_{XK}^2 + \dot{V}_{YK}^2 + (\dot{V}_{ZK} + g)^2} \quad (1)$$

167 Where  $\dot{V}_{XK}^2$  = forward kinematic acceleration and  $\dot{V}_{YK}^2$  = lateral kinematic acceleration.

168 We calculated average kinematic acceleration on the first upstroke duration ( $t_{up}$ , in ms).

169 Average  $\dot{V}_{RK}$  was compared to resultant acceleration calculated from the average ground

170 reaction force ( $\dot{V}_{RFP}$ , see below) during this period. Resultant acceleration calculated from the  
 171 kinematics was also averaged on the duration of each wingbeat ( $t_{wb}$ , in ms) from the start of  
 172 upstroke to the start of the next upstroke). This average  $\dot{V}_{RK}$  was compared to resultant  
 173 acceleration calculated using PIV data ( $\dot{V}_{RPIV}$ , see below).

174

#### 175 *Ground-reaction forces*

176 In Paris, a wooden perch 1.5 cm in diameter and 8.5 cm long was mounted on a force  
 177 platform (Kistler Squirrel force plate (Kistler France, Les Ulis, France, resolution  $\pm 0.01$ N)  
 178 with a top plate of 20cm $\times$ 10cm and attached to a charge amplifier (Kistler type 9865). It was  
 179 used to record the vertical and horizontal ground-reaction forces exerted on the perch at 400  
 180 Hz, using BioWare® Software Version 4.0.x Type 2812A (Kistler France).

181 The force perch in Montana was 1.3 cm in diameter, 7 cm long. It was covered in  
 182 sandpaper to provide traction. The perch was mounted with its axis in line with the surface of  
 183 a custom Bertec force plate (15 x 15 cm platform, 200 Hz resonant frequency, Bertec Corp.,  
 184 Columbus, OH, USA). Forces on the Bertec plate were digitally amplified 10x (Bertec  
 185 AM6800) and recorded at 500 Hz using Chart software v4.5 (ADInstruments, Inc., Colorado  
 186 Springs, CO, USA) and a Powerlab 8 SP A/D converter (ADInstruments Inc.).

187 Forces were filtered using a zero phase shift low-pass (50Hz) Butterworth filter. The  
 188 resultant acceleration, measured using the force plate ( $\dot{V}_{RFP}$ ) was calculated:

189

$$190 \quad \dot{V}_{RFP} = \frac{\sqrt{F_x^2 + F_y^2 + F_z^2}}{m} \quad (2)$$

191

192 Where  $F_x$  = forward force,  $F_y$  = lateral force,  $F_z$  = vertical force. For comparison with average  
 193  $\dot{V}_{RK}$  during the first upstroke (i.e., during ground contact), we averaged  $\dot{V}_{RFP}$  on  $t_{up}$ .



194 To measure the relative hindlimb contribution to initial resultant flight velocity (i.e., percent  
 195 of  $V_{AK}$  comprised by  $V_{RFP}$ ) at lift off ( $LO$ ), we followed the methods of Earls (Earls, 2000)  
 196 and integrated  $V_{RFP}$  with respect to time ( $t$ ) from the beginning of take-off ( $t_0$ ) to  $LO$ :

$$197 \quad V_{RFP} = \int_{t_0}^{LO} \frac{\sqrt{F_A^2 + F_T^2 + (F_Z - mg)^2}}{m} dt \quad (3)$$

### 199 *Particle Image Velocimetry (PIV)*

200 To compare aerodynamics with associated wingbeat kinematics, we used a  
 201 synchronized high-speed video camera (Photron 1024 PCI (Photron USA Inc., San Diego,  
 202 CA, USA)) sampling at 500 Hz, and located lateral to the animal. Data acquisition and  
 203 analysis of PIV was performed using a LaVison GmbH (Goettingen, Germany) PIV system  
 204 running DaVis 7.1 software. A dual-cavity pulsed 50-mJ Nd: YAG laser was used to  
 205 illuminate a flow field of 3 mm thick, with planar dimensions spanning a field of 25×33 cm.  
 206 The illumination field was cranial to the bird, parasagittal and mid-wing at the middle of  
 207 downstroke (Spedding et al., 2003; Warrick et al., 2005). We seeded the air with particles of  
 208 olive oil (<1 μm in diameter) generated at a rate of  $7 \times 10^{10}$  particles s<sup>-1</sup> using a vaporizer fitted  
 209 with a Laskin nozzle. Particle illumination was recorded using a 1376×1040 pixel, charged-  
 210 coupled-device (CCD) camera placed perpendicular to the illumination field, and PIV  
 211 samples were obtained at 5 Hz. To calculate particle velocity, we used cross-correlation of  
 212 paired images with an elapsed time between images ( $\Delta t$ ) of 500 μs. Average particle  
 213 separation was 6 pixels in the centre of the animal's wake. We employed an adaptive  
 214 multipass filter with an initial interrogation area of 64×64 pixels and final area of 16×16  
 215 pixels with 50% overlap. Vector fields were post processed using a median filter (strong  
 216 removal if difference relative to average >3×r.m.s. of neighbours and iterative reinsertion if  
 217 <3×r.m.s. of neighbours), removal of groups with <5 vectors, fill of all empty spaces by  
 218 interpolation, and one pass of 3×3 smoothing. Subsequent analysis focused upon vortex cores.

We used streamlines, drawn with vectors expressed relative to average velocity, to inform our selection of regions of vorticity ( $\omega$ , in  $\text{s}^{-1}$ ), which is a measure of local change in velocity in the flow field (Spedding et al. 2003). We treated as background noise and masked from subsequent analysis  $|\omega| < 3\text{s.d. of } |\omega|$  in the free-stream. To measure circulation ( $\Gamma$ ,  $\text{m}^2\cdot\text{s}^{-1}$ ) in vortex cores, we used methods adapted from Spedding et al. (Spedding et al., 2003). We integrated all same-sign  $\omega$  in a given PIV field within 1.5 chord lengths of peak  $\omega$  to measure  $\Gamma$  (e.g., Fig. 3). We considered each negatively-signed vortex core deposited in the wake during early downstroke to represent the cross section of a starting vortex shed from the trailing edge of the wing, equal in magnitude but opposite in sign from the bound vortex on the wing as lift development began during downstroke. Similarly, we considered each positively signed vortex core deposited in the wake during late downstroke to represent the cross-section of an ending vortex shed from the trailing edge of the wing.

We estimated average lift during the entire wingbeat ( $L$ ) by coupling our PIV data with separately acquired three-dimensional kinematic data for the same test subjects ((Spedding et al., 2003; Warrick et al., 2005; Tobalske and Dial, 2007) see *Kinematics*, above). Note that  $L$  includes vertical (weight support) and horizontal (thrust) components. Average  $L$  was estimated:

$$L = \rho \frac{A(\Gamma + cSV_{\text{vort}})}{t_{\text{wb}}} \quad (4)$$

where  $\rho$  is air density (air density in Missoula at 1000 m in altitude is  $1.06 \pm 0.01 \text{kg}\cdot\text{m}^{-3}$ ),  $A$  is the area swept by the two wings during each downstroke, not including the body,  $c$  is added-mass coefficient (Dabiri, 2005),  $S$  is average diameter of observed vortex cores, and  $V_{\text{vort}}$  is self-induced vortex velocity (Dabiri, 2005). Following Spedding et al. (Spedding et al., 2003) and Warrick et al. (Warrick et al., 2005), we assumed that a single vortex loop shed per downstroke and that no contraction occurred during wake development. We assumed  $c=0.72$  as the added-mass coefficient previously reported for an elliptical vortex (Dabiri, 2005). We

measured  $V_{vort}$  as observed rate of translation of  $\omega_{max}$  in the subset (N=37 for zebra finch and N=42 for diamond dove) of our PIV samples in which the same vortex core appeared in consecutive images. We also measured the magnitude and angle from horizontal for induced velocity ( $m s^{-1}$ ) in the middle of the shed vortices (Tobalske and Dial, 2007).

We estimated average acceleration using the PIV data ( $\dot{V}_{RPV}$ ), which was the acceleration due to aerodynamic force produced during each wingbeat:

$$\dot{V}_{RPV} = \frac{L}{m} \quad (5)$$

*Advance ratio*

To provide insight into the potential for wing-wake interaction and other unsteady aerodynamic effects (Spedding, 1993; Dickinson et al., 1999) to dominate wing function during take-off, we calculated advance ratio (dimensionless) using kinematic data ( $J_K$ ) and using kinematics coupled with PIV data ( $J_{PIV}$ ). Advance ratio in aeronautical engineering is an expression of aircraft velocity divided by the tip velocity of the aircraft's propeller, or, equivalently, distance travelled by the aircraft relative to the excursion of the propeller tip during one revolution (Vogel, 1994). Rather than assume sinusoidal motion of the oscillating wing as is traditionally done when adapting propeller equations to model advance ratio in animals that oscillate their wings (Ellington, 1984; Vogel, 1994), we used observed three-dimensional wingtip velocity relative to the bird ( $V_{wtip}$ ). Thus:

$$J_K = \frac{V_{RK}}{V_{wtip}} \quad (6)$$

and

$$J_{PIV} = \frac{D_{wake}}{c_{wb} V_{wtip}} \quad (7)$$

Where  $D_{wake}$  = the average distance (m) between vortices in the wake. Note that Eq. (7) includes the contribution of self-convection of shed vortices:

$$\frac{D_{wake}}{c_{wb}} \cong V_{RK} + V_{vort} \quad (8)$$

268  $J_{PIV}$  was undefined for wingbeat one, as it lacks a previously shed vortex ( $D_{wake}$  was  
269 undefined).

270

## 271 *Statistics*

272 To test for differences in the timing of first downstroke and  $LO$ , we used two-way  
273 repeated measures ANOVA with time and individual as factors and taking into account the  
274 trial repetition and species.

275 We also used two-way repeated measures ANOVA to test for a statistically-significant  
276 difference between wingbeat 1 and subsequent wingbeats for  $L$ , angle magnitude of induced  
277 velocity in the wake and  $J_K$ . Wingbeat and individuals were used as factor and the trial  
278 repetition was also taken into account for both species.

279 Lastly, t-tests were used to compare data sets coming from kinematic analysis with  
280 data sets coming from ground reaction force or aerodynamic analyses. All statistical tests  
281 were performed using R (Package *stats* version 2.15.0 (R Development Core Team, 2010)).  
282 Throughout, we report mean  $\pm$  s.d..

283

## 284 **Results**

### 285 *Kinematics*

286 During the preparation to take-off each bird crouched from a standing position. This  
287 counter movement (starting at time  $t_0$ ) was visible in both species but was more evident in  
288 diamond dove, with a lower body angle before  $LO$  ( $16.3 \pm 5.3$  degrees) compared with the  
289 zebra finch ( $20.1 \pm 7.3$  degrees) (Fig. S2). During the second phase of take-off, the birds start  
290 extending their hindlimbs and forelimbs. This happened at  $28.3 \pm 7.6$  ms before  $LO$  in zebra  
291 finch compared to  $38.9 \pm 8.10$  ms before  $LO$  in diamond dove. This is about 80% and 60% of  
292 the time from the start of counter movement ( $t_0$ ) to  $LO$  in the zebra finch and diamond dove,

respectively. Both species started their first downstroke after their feet were completely off the perch (2 ms delay in the zebra finch, 6 ms in the diamond dove). However, these differences in timing were not statistically significant (zebra finch: ANOVA: factor=timing:  $F_{1,26}=0.01$ ;  $P>0.9$ ; factor=individuals:  $F_{1,3}=0.02$ ;  $P>0.7$ ; in diamond dove: ANOVA: factor=timing:  $F_{1,9}=4.9$ ;  $P>0.06$ ; factor=individuals:  $F_{1,2}=0.04$ ;  $P>0.2$ ) and, it should be noted that 2 ms was the margin of error for our video sampling at 500 Hz. The first wingbeat ends 24.5±6.1ms after lift-off in zebra finch compared to 37.9±6.2 ms in diamond dove. In zebra finch, each wingbeat lasts approximately 50ms, compared to 70ms in diamond dove. These durations are nearly equivalent in terms of the total wingbeat cycle, at 52.3% in the zebra finch and 54.1% in the diamond dove.

In both species,  $V_{RK}$  increased during the first two phases of take-off (Fig. 1A, C). In zebra finch the  $V_{RK}$  increased from  $0.03\pm0.03\text{m.s}^{-1}$  at  $t_0$  to  $1.74\pm0.3\text{m.s}^{-1}$  at  $LO$ . In diamond dove, the  $V_{RK}$  increased from  $0.04\pm0.1\text{m.s}^{-1}$  to  $1.29\pm0.1\text{m.s}^{-1}$  at  $LO$ . After  $LO$ ,  $V_{RK}$  remained fairly constant during the first three wingbeats and reached  $1.8\pm0.6\text{m.s}^{-1}$  in zebra finch and  $1.7\pm0.1\text{m.s}^{-1}$  in diamond dove. The  $V_{RK}$  at  $LO$  corresponded to 92.3±4.2% of the maximal  $V_{RK}$  reached during the first wingbeat in zebra finch and 79.4±3.9% in diamond dove.

The acceleration profile shows a peak during the perching phase of take-off. In zebra finch,  $\dot{V}_{RK}$  reached  $47.2\pm14.4\text{ m.s}^{-2}$  ( $4.8 \times$  body weight), and occurred 28.3±6.0 ms before  $LO$  (Fig. 1B). In diamond dove,  $\dot{V}_{RK}$  reached  $26.7\pm3.2\text{m.s}^{-2}$  ( $2.7 \times$  body weight) and occurred 23.5±7.9 ms before  $LO$  (Fig. 1D). These times are 80.6 % and 76.5% of the interval between  $t_0$  and  $LO$  in zebra finch and diamond dove, respectively.

### *Force production of legs*

The  $\dot{V}_{RFP}$  produced during take-off, calculated using ground-reaction force, was  $47.8\pm7.5\text{ m.s}^{-2}$  in zebra finch, compared to  $26.7\pm7.0\text{ m.s}^{-2}$  in diamond dove (Fig.2A, C). Thus,

the maximal leg force produced by the animal corresponds to  $4.9 \pm 0.7 \times$  body weight for zebra finch and  $2.7 \pm 0.3 \times$  body weight for diamond dove. Average  $\dot{V}_{RFP}$  during the first upstroke was  $35.5 \pm 18.0 \text{ m.s}^{-2}$  in zebra finch and  $25.2 \pm 8.8 \text{ m.s}^{-2}$  in diamond dove (Fig. 4). The peak  $\dot{V}_{RFP}$  was  $1.78 \pm 0.6 \text{ m.s}^{-1}$  at LO in zebra finch and  $1.2 \pm 0.4 \text{ m.s}^{-1}$  in diamond dove (Fig. 2 B, D).

### *Force production of the wings.*

For zebra finch, the first wingbeat produced significantly less  $L$  than the second and third ones (ANOVA: factor = wingbeat:  $F_{1,27}=16.03$ ;  $P < 0.001$ ; factor=individuals:  $F_{1,3}=0.9$ ;  $P > 0.1$ ). Therefore, for the first wingbeat,  $L$  represented  $0.9 \pm 0.4 \times$  body weight, whereas it comprised  $1.4 \pm 0.6 \times$  body weight for the second wingbeat and  $1.7 \pm 0.2$  for the third one. The  $\dot{V}_{RPIV}$  produced during the first wingbeat was  $58 \pm 3.4\%$  of that during the second and third wingbeats (Fig. 4A). Considering the relevant variables for estimating  $L$  (Eq. 4; Table 2A) the differences were due to less circulation ( $\Gamma$ ), a smaller area ( $A$ ) of the vortex loop and a lower induced velocity during the first wingbeat, compared to the subsequent wingbeats. Angle of the induced velocity in the wake for all three wingbeats was not significantly different among wingbeats (ANOVA: factor = wingbeat:  $F_{1,18}=0.11$ ;  $P > 0.7$ ; factor=individuals:  $F_{3,18}=2.3$ ;  $P < 0.1$ ). Although the general trend was for induced velocity to increase with wingbeat number, high variability meant that induced velocity of the first wingbeat,  $3.9 \pm 1.8 \text{ m s}^{-1}$ , was not significantly less than the second ( $5.1 \pm 2.3 \text{ m s}^{-1}$ ) and third wingbeat ( $5.1 \pm 1.6 \text{ m s}^{-1}$ ).

For diamond dove, the first wingbeat also produced significantly less  $L$  than the subsequent ones (ANOVA: factor = wingbeat:  $F_{1,35}=5.6$ ;  $P < 0.05$ ; factor=individuals:  $F_{1,2}=1.6$ ;  $P > 0.2$ ). For the first wingbeat,  $L$  was  $0.9 \pm 0.3 \times$  body weight,  $1.1 \pm 0.3$  for the second wingbeat, and  $1.7 \pm 0.6$  for the third wingbeat. The first wingbeat comprised  $63 \pm 5.2\%$  of  $\dot{V}_{RPIV}$  produced during the subsequent wingbeats (Fig. 4B). As in the finch, less  $L$  was associated with less  $\Gamma$  and a lower induced velocity in wingbeat 1 (Table 2B). Angle of the

induced velocity for the first wingbeat was significantly lower than the second (ANOVA: factor = wingbeat:  $F_{1, 23} = 43.5$ ;  $P < 0.001$ ; factor=individuals:  $F_{2, 23} = 1.8$ ;  $P > 0.1$ ). Induced velocity for the first wingbeat was  $4.4 \pm 1.3 \text{ m s}^{-1}$ , and  $5.2 \pm 1.1 \text{ m s}^{-1}$  for the second wingbeat. These values were statistically different (ANOVA: factor = wingbeat:  $F_{1, 32} = 8.7$ ;  $P < 0.006$ ; factor = individual:  $F_{2, 32} = 2.8$ ;  $P > 0.07$ ).

#### *Comparison of wing and leg contributions*

During the first phase of take-off, when the bird was on the perch with folded wings,  $V_{RFP}$  was similar to  $V_R$  in both species (for zebra finch: T-test:  $df = 13$ ,  $P > 0.7$ ; for diamond dove: T-test:  $df = 12$ ,  $P > 0.5$ ) (Fig 2B, D). Both  $V_{RFP}$  and  $V_R$  followed a similar pattern in both species (for zebra finch: t-test:  $df = 13$ ,  $P > 0.6$ ; for diamond dove: t-test:  $df = 12$ ,  $P > 0.21$ ) (Fig. 2A, C). This means that during the first phase of take-off the legs are responsible for the entire resultant velocity and resultant acceleration.

During the second phase of take-off, when the wings were unfolded,  $V_{RFP}$  was lower than  $V_R$ ,  $34.56 \pm 7.9 \text{ m.s}^{-2}$  for  $V_{RFP}$  compared to  $43.63 \pm 6.45 \text{ m.s}^{-2}$  for  $V_R$  in zebra finch, and  $24.51 \pm 3.18 \text{ m.s}^{-2}$  for the  $V_{RFP}$  compared to  $33.21 \pm 1.8 \text{ m.s}^{-2}$  for  $V_R$  in diamond dove (Fig. 4A, B). Moreover, at LO,  $V_{RFP}$  was  $93.6 \pm 0.6\%$  of the  $V_R$  in zebra finch, and  $95.2 \pm 0.4\%$  of  $V_R$  in diamond dove (Fig 2B, D). Average  $V_{RFP}$  during the second phase of take-off was significantly different from  $V_R$  (for zebra finch: t-test:  $df = 13$ ,  $P < 0.05$ ; for diamond dove: t-test:  $df = 12$ ,  $P < 0.05$ ).

After LO, the  $V_R$  during the first wingbeat was significantly different from  $V_{RFP} + V_{RPIV}$  (for zebra finch: t-test:  $df = 13$ ,  $P < 0.001$ ; for diamond dove: t-test:  $df = 12$ ,  $P < 0.001$ ). But we can notice that for wingbeat 1,  $V_R$  is approximately equal to the sum of  $V_{RFP}$  and  $V_{RPIV}$ .

During the following wingbeats (Fig.4) there was no significant difference in the  $\dot{V}_{APV}$  compared with  $\dot{V}_{RR}$  (for the second wingbeat in zebra finch: t-test: df = 13, P = 0.37; for diamond dove: t-test: df = 12, P = 0.20).

Advance ratio measured using kinematics ( $J_K$ ) did not differ significantly between wingbeats (for zebra finch: ANOVA: factor = wingbeat:  $F_{2,3} = 3.0$ ; P > 0.1; factor=individuals:  $F_{1,3} = 0.14$ ; P > 0.7; for diamond dove: ANOVA: factor = wingbeat:  $F_{2,3} = 0.65$ ; P > 0.5; factor=individuals :  $F_{1,3} = 0.03$ ; P > 0.8), or among species (ANOVA: factor = species:  $F_{1,14} = 3.31$ ; P > 0.09; factor=individuals :  $F_{1,14} = 0.14$ ; P > 0.7).

But  $J_{PIV}$  was significantly larger in zebra finch (~ 0.40) compared with diamond dove (~0.30) during wingbeats 2 and 3 (t-test: df = 5, P < 0.0003), and  $J_{PIV}$  was always greater than  $J_K$  (t-test: df = 11, P < 0.0001) which varied from 0.17 – 0.32 (Table 2).

## Discussion

The wings of birds have historically been considered as the primary force producers during take-off (Rüppell, 1975; Heppner and Anderson, 1985). However, more recent studies (Earls, 2000; Tobalske, 2004; Berg and Biewener, 2010) agree that the legs play a key role in producing the acceleration needed for take-off. By combining three different data sets to calculate force production we were able to assess the relative role of both hindlimbs and forelimbs through take-off in two new species of birds with different wing shape and ecology. Our data show that in zebra finch, a small passerine, and in diamond dove, a small columbid, the hindlimbs and forelimbs are successively used, with hindlimb dominance in the first phases of take-off providing initial acceleration, and coordinated use of wings to maintain velocity through the first three wingbeats. Despite dramatic differences in body size, wing morphology (Table 1) and slow-flight kinematics (Tobalske, 2007), we did not observe significant differences between species in aerodynamic force produced. Rather, the most



392 prominent difference between birds was observed at the initial acceleration - due almost  
 393 exclusively to the hindlimbs - and subsequent flight velocity upon leaving the perch, both of  
 394 which were greater in the zebra finch versus the dove.

395

396 During the first phase of take-off, the resultant acceleration calculated from the force  
 397 data ( $\vec{V}_{RFP}$ ) was not significantly different from the resultant acceleration calculated from the  
 398 kinematic data ( $\vec{V}_{RK}$ , Figs 1 and 2), indicating that legs were wholly responsible for the  
 399 acceleration while on contact with the perch during preparation to take-off. An acceleration  
 400 peak is observed in both species, with a magnitude four times greater than that observed after  
 401 lift-off (*LO*). We can notice that this acceleration peak occurred at the transition between the  
 402 first and the second phase of take-off in zebra finch ( $28.3 \pm 6.0$  ms before lift-off) whereas it  
 403 happened slightly after the beginning of the first upstroke in diamond dove ( $15.35 \pm 4.2$  ms  
 404 after the beginning of the second phase) (Fig. 1B and D). For both birds, this acceleration  
 405 peak occurs while still on the perch. The observed maximal vertical force production ( $F_z$ ) was  
 406 greater than what is reported in other studies: from  $1.3\text{--}2.3 \times$  body weight in the pigeon  
 407 compared to  $2.9\text{--}3.6$  in diamond dove and  $3.6\text{--}8.3$  in zebra finch (Clark and Alexander, 1975;  
 408 Heppner and Anderson, 1985; Bonser and Rayner, 1996). We also observed that relative  
 409 hindlimb forces produced by the dove (50 g) were  $55 \pm 2.5\%$  lower than the finch (15 g),  
 410 which was consistent with the hypothesis that the maximal acceleration generated across  
 411 species should be inversely proportional to body weight (Bonser and Rayner, 1996).

412 In the second phase of take-off, corresponding to the first upstroke, the average  $\vec{V}_{RFP}$   
 413 represented  $93 \pm 0.6\%$  of the resultant acceleration calculated from the kinematic data for zebra  
 414 finch and  $92.1 \pm 0.4\%$  for diamond dove (Fig. 4). This indicates a combined action of the  
 415 hindlimbs with the forelimbs, although the hindlimbs dominated. The wings started to unfold  
 416 at the same moment as the acceleration profiles of ground reaction forces and kinematics start

417 to diverge (Fig. 2A, C). We can suggest that forces produced by the wings (Crandell and  
 418 Tobalske, 2011; Ros et al., 2011) may be responsible for a part of the observed disparity  
 419 between ground reaction forces and observed kinematics in diamond dove. However, it seems  
 420 unlikely that zebra finch is generating an aerodynamically-active upstroke, as the species uses  
 421 a flexed-wing upstroke (Tobalske et al., 1999), and no aerodynamic activity was visible in the  
 422 wake. The bird's body is rotating upward as legs are extending and this rotational kinematics  
 423 acceleration might be added inappropriately to our linear  $\dot{V}_{RK}$ , thus leading to an  
 424 overestimation of its magnitude. In any case, our data show that in both species, the initial  
 425 acceleration peak is predominantly due to the hindlimbs, with the legs contributing to  
 426 approximately 70-80% of  $\dot{V}_{RK}$  produced during the second phase of take-off.

427 Surprisingly, despite large differences in leg and wing morphology (Table 1), both  
 428 species appear to promote similar tactics of wing and leg use. However, in comparing  
 429 maximal velocity of the first wingbeat ( $V_{RK}$ ) to that produced by the legs ( $V_{FP}$ ) at *LO*, an  
 430 interesting pattern emerges. In zebra finch,  $92.3 \pm 4.2\%$  of the maximal velocity was reached  
 431 by *LO*, and only  $79.36 \pm 3.9\%$  in diamond dove (Fig 2B, D). Observed velocities produced by  
 432 the leg forces were on the high end of the range that has previously been reported for  
 433 European starling, Japanese quail, rufous hummingbird, and pigeon; for which the percentage  
 434 of velocity reached at *LO* corresponds to between 59% and 90% of the velocity achieved at  
 435 the next upstroke/downstroke transition (Earls, 2000; Tobalske, 2004; Berg and Biewener,  
 436 2010). In comparing magnitude of resultant acceleration previously reported with data from  
 437 the present study, we see that both the zebra finch ( $4.4 \text{ m.s}^{-2}$ ) and diamond dove ( $3.4 \text{ m.s}^{-2}$ )  
 438 were near the European starling ( $4.3 \text{ m.s}^{-2}$ ) (Earls, 2000). All three of these species are  
 439 ecological generalists in their respective habitats, and legs contribute to 92%, 79%, and 95%  
 440 of total velocity respectively by take-off. In contrast, the resultant acceleration of a highly  
 441 specialized aerial bird, the rufous hummingbird, is  $1.78 \text{ m.s}^{-2}$  with legs contributing to only

442 60% of total velocity (Tobalske et al., 2004). On the other end of the spectrum, the Japanese  
 443 quail, a ground specialist, produces an acceleration maximum of  $8.3\text{m.s}^{-2}$ , contributing to 89%  
 444 body velocity. This continuum suggests the interaction between wings and legs should be  
 445 framed in an ecological context, and merits further exploration with a larger sample size.

446 In both zebra finch and diamond dove, the beginning of the first downstroke occurs  
 447 approximately a few milliseconds after the bird leaves the perch, resulting in a discrete  
 448 succession in the use of the hindlimbs and forelimbs. However, we can concede that the  
 449 relative timing of the different phases of take-off is closely related to the animal's state of  
 450 stress. Informally, we observed that the more the bird was stressed, the earlier the wings  
 451 would start to be used which is consistent with the previous studies on take-off (Earls, 2000;  
 452 Tobalske et al., 2004). In this study, only trials with spontaneous, unstressed take-off were  
 453 analyzed, resulting in a low variability in the timing of take-off phases.

454 In the aerial phase of take-off, our data show that during the first wingbeat, the  
 455 acceleration calculated from the PIV data ( $V_{\text{PIV}}$ ) represented only  $24.8 \pm 4.2\%$  of  $V_{\text{BK}}$  in zebra  
 456 finch and  $29.9 \pm 3.6\%$  in diamond dove. This further demonstrates that during the first  
 457 wingbeat, the resultant acceleration is mostly due to the hindlimb contribution, with wings  
 458 contributing to about 30% of this acceleration. Moreover, we can note that lift production ( $L$ )  
 459 during the first wingbeat represents only  $58 \pm 3.4\%$  of the force produced by the subsequent  
 460 wingbeats in zebra finch and  $63 \pm 5.2$  in diamond dove. Both finch and dove did not produce  
 461 enough force in the first wingbeat to support bodyweight in the air ( $0.9 \pm 0.4$  and  $0.9 \pm 0.3 \times$   
 462 bodyweight respectively), but, given the large standard deviations (Fig. 4), they may have  
 463 supported body weight some of the time. Regardless, this minimal force production was not  
 464 enough to accelerate quickly without relying on the initial acceleration of the legs. This is  
 465 compensated by the following wingbeats, where force production increased well above that  
 466 required for support of body weight (1.4 and 1.7 for finch and 1.1 and 1.7 for dove),

467 indicating force used toward net acceleration. Relatively large standard deviations for  $L$  and  
468  $V_{APV}$  may also be linked to motivational differences between trials.

469 Both bird species follow a general pattern in force production by the wings, producing  
470 near minimal required to counter gravity and then increasing with subsequent wingbeats. This  
471 implies that generalist birds may have tuned the timing and magnitude of force production by  
472 the wings to accommodate neuromuscular, aerodynamic or environmental constraints. Our  
473 estimates of lift that increase with each wingbeat during take-off are consistent with direct  
474 measures of muscle activity in pigeons in which the pectoralis muscles are recruited at lower  
475 levels and produce lower force during the first wingbeat compared with subsequent wingbeats  
476 (Dial and Biewener, 1993a; Tobalske and Biewener, 2008). Several mechanisms may explain  
477 this variation in force production. One hypothesis we suggest is the birds may capitalize on a  
478 mechanism similar to wake-recapture (Sane, 2003) the subsequent wingbeats are capable of  
479 capitalizing on induced flow from previous wingbeats. If this is the case, the first wingbeat is  
480 incapable of benefiting from induced flow, and may, therefore, exhibit weaker lift. Our  
481 observed low advance ratios ( $J_K$  and  $J_{PIV}$ ; Table 2) suggest that wings may interact with  
482 previously shed circulation in the wake (Spedding, 1993). Even accounting for the  
483 contribution of self-convection of shed vortices away from the flying animal ( $V_{vort}$ ), advance  
484 ratios were considerably less than 1 ( $J_{PIV}$ , Table 2). This revealed that the wingtips were  
485 always moving much further than the body during a given wingbeat. Another possible  
486 influence is the orientation of the body relative to the wake changes from first to subsequent  
487 wingbeats (Table 2; S2), and body angle may initially be in an unfavorable orientation. In this  
488 case, angle of induced downwash in the finch was not statistically different from the first to  
489 subsequent wingbeats, but diamond dove angle of induced velocity was different, suggesting  
490 doves may be under pressure to reorient their body, but not finches. Finally, there may be a  
491 need to provide enough space for the wings to complete a full downstroke without hitting the

492 substratum and risking wing damage (Heppner and Anderson, 1985). Thus, the wings are  
493 spatially limited and complete a smaller arc. Clearly, further studies of potential unsteady  
494 aerodynamic performance and the interactions between substrate and air are necessary.

495 In the zebra finch, the acceleration produced by the wings during the first wingbeat ( $V_{RH}$  and  
496  $V_{FIV}$ ) represents a lower proportion of the acceleration produced during the subsequent  
497 wingbeats than in diamond dove (Figs. 2 and 4). Diamond doves use a tip-reversal upstroke,  
498 and we hypothesize that this style of upstroke is aerodynamically active (Crandell and  
499 Tobalske, 2011; Ros et al., 2011). Tip-reversal may provide an earlier onset of useful  
500 aerodynamic force production during the first wingbeat in diamond dove. Due to the  
501 interaction of body mass with acceleration in the present study, this suggestion must be  
502 interpreted as tentative. It would be useful to test this hypothesis within a clade that exhibits  
503 variation in body mass and upstroke style.

504 During take-off, the amount of acceleration produced by the hindlimbs is much higher  
505 than the acceleration produced by the forelimbs. It can be linked to the fact that it is more  
506 efficient to push against the ground than against the air (Dickinson et al., 2000). These data  
507 emphasize the prominent role of the hindlimbs in all avian locomotor behaviors except flight  
508 (Dial, 2003; Abourachid et al., 2011; Provini et al., 2012). This work suggests that during the  
509 transitional first wingbeat timing coordination exists between wings and legs, which can be  
510 seen as anatomical and neuromuscular systems, previously identified as “modules” in birds  
511 (Gatesy and Dial, 1996). Our results combined with previous work (Earls, 2000; Tobalske et  
512 al., 2004) support the general conclusion underscoring the prominent role of hindlimbs during  
513 take-off in a phylogenetically, morphologically and ecologically diverse array of birds. More  
514 extensive phylogenetic analysis is warranted to test the generality of the hypothesis of a  
515 universal hindlimb drive during take-off in birds. But, if this pattern is universal, this would  
516 provide support for the leaping model for the origin of flight (Garner et al., 1999). Indeed, in

cursorial theropod dinosaurs, powerful hindlimbs would have been a useful preadaptation to a hindlimb driven take-off. Moreover, in our study, we see incremental use of the flight apparatus for the first wingbeat, as suggested by the work of Jackson et al. (Jackson and Dial, 2011) on WAIR (wing-assisted incline running) where birds use rapid flapping of the wings to run up inclined surfaces. Even though we studied a standing take-off instead of WAIR, our data suggest that incremental use of the pectoralis muscle can modulate leg performance and contribute to weight support, and thus is a relevant model for the evolutionary origin of flapping. Therefore, our results may provide novel insights on the origin of avian flight as they are consistent with both leaping and WAIR models (Garner et al., 1999; Dial, 2003) with a hindlimb driven take-off assisted by a gradual use of the forelimb through the first wingbeats.

## List of symbols

|                   |                                                 |
|-------------------|-------------------------------------------------|
| PIV               | particle image velocimetry                      |
| USDS              | upstroke/downstroke transition                  |
| DSUS              | downstroke/upstroke transition                  |
| FW                | First use of the wings                          |
| LO                | Lift-off                                        |
| c                 | vortex added mass coefficient                   |
| g                 | gravitational acceleration                      |
| m                 | body mass                                       |
| t                 | time                                            |
| t <sub>0</sub>    | start of take-off with countermovement          |
| t <sub>up</sub>   | 1 <sup>st</sup> upstroke duration               |
| t <sub>wb</sub>   | full wingbeat duration                          |
| A                 | loop area of wake vortex                        |
| D <sub>wake</sub> | distance between shed vortices                  |
| F <sub>X</sub>    | forward force                                   |
| F <sub>Y</sub>    | lateral force                                   |
| F <sub>Z</sub>    | vertical force                                  |
| J <sub>k</sub>    | advance ratio from kinematics                   |
| J <sub>PIV</sub>  | advance ratio from kinematics and aerodynamics  |
| L                 | average lift                                    |
| S                 | width of wake vortex                            |
| $V_{app}$         | velocity calculated using data from force plate |

|     |                  |                                                         |
|-----|------------------|---------------------------------------------------------|
| 553 | $V_{RK}$         | velocity calculated using kinematic data                |
| 554 | $V_{vort}$       | Self-convection velocity of shed vortices               |
| 555 | $\dot{V}_{RFP}$  | Acceleration calculated using data from force plate     |
| 556 | $\dot{V}_{RK}$   | Acceleration calculated using kinematics                |
| 557 | $\dot{V}_{APIV}$ | Average acceleration calculated from PIV and kinematics |
| 558 | $\dot{V}_{XK}$   | Forward acceleration calculated from kinematics         |
| 559 | $\dot{V}_{YK}$   | Lateral acceleration calculated from kinematics         |
| 560 | $\dot{V}_{ZK}$   | Vertical acceleration calculated from kinematics        |
| 561 | $\Delta t$       | elapsed time between PIV paired images                  |
| 562 | $\omega$         | vorticity                                               |
| 563 | $\Gamma$         | circulation                                             |
| 564 | $\rho$           | air density                                             |
| 565 |                  |                                                         |

## 566 Acknowledgments

567 We are grateful to Paul-Antoine Libourel, Hugues Clamouze and Brandon Jackson for their  
568 help during the experiments. Thanks to Bieke Van Hooydonck and Anthony Herrel for the  
569 force platform used in Paris. Thanks to Camille Dégardin for her help with the illustrations.  
570 This research was supported by grants from the UMR 7179, ATM Formes (MNHN) and from  
571 ED-FdV and Bettencourt-Schueller foundation fellowships as well as NSF grants IOS-  
572 0923606 and IOS-0919799.

## 574 References

- 575  
576  
577  
578 **Abourachid, A.** (1993). Mechanics of standing in birds - Functional explanation of lameless  
579 problems in giant turkeys. *British Poultry Science* **34**, 887-898.  
580  
581 **Abourachid, A., Hackert, R., Herbin, M., Libourel, P. A., Lambert, F., Gioanni, H.,**  
582 **Provini, P., Blazevic, P. and Hugel, V.** (2011). Bird terrestrial locomotion as revealed by 3D  
583 kinematics. *Zoology* **114**, 360– 368.  
584  
585 **Askew, G. N., Marsh, R. L., Ellington, C. P.** (2001). The mechanical power output of the  
586 flight muscles of blue-breasted quail (*Coturnix chinensis*) during take-off. *Journal of*  
587 *Experimental Biology* **204**, 3601-3619.  
588

589 **Berg, A. M. and Biewener, A. A.** (2010). Wing and body kinematics of takeoff and landing  
590 flight in the pigeon (*Columba livia*). *Journal of Experimental Biology* **213**, 1651-1658.  
591

592 **Bonser, R. H. C. and Rayner, J. M. V.** (1996). Measuring leg thrust forces in the common  
593 starling. *Journal of Experimental Biology* **199**, 435-439.  
594

595 **Clark, J. and Alexander, R. M.** (1975). Mechanics of running by quail (*Coturnix*). *Journal*  
596 *of Zoology* **176**, 87-113.  
597

598 **Crandell, K. E. and Tobalske, B. W.** (2011). Aerodynamics of tip-reversal upstroke in a  
599 revolving pigeon wing. *Journal of Experimental Biology* **214**, 1867-1873.  
600

601 **Dabiri, J. O.** (2005). On the estimation of swimming and flying forces from wake  
602 measurements. *Journal of Experimental Biology* **208**, 3519-3532.  
603

604 **Dial, K. P.** (2003). Wing-assisted incline running and the evolution of flight. *Science* **299**,  
605 402-404.  
606

607 **Dial, K. P. and Biewener, A. A.** (1993a). Pectoralis-muscle force and power output during  
608 different modes of flight in Pigeons (*Columbia livia*). *Journal of Experimental Biology* **176**,  
609 31-54.  
610

611 **Dial, K. P. and Biewener, A. A.** (1993b). Pectoralis muscle force and power output during  
612 different modes of flight in Pigeons (*Columbia livia*). *Journal of Experimental Biology* **176**,  
613 31-54.  
614

615 **Dial, K. P., Jackson, B. E. and Segre, P.** (2008). A fundamental avian wing-stroke provides  
616 a new perspective on the evolution of flight. *Nature (London)* **451**, 985-989.  
617

618 **Dickinson, M. H., Lehmann, F. O. and Sane, S. P.** (1999). Wing rotation and the  
619 aerodynamic basis of insect flight. *Science* **284**, 1954-1960.  
620

621 **Dickinson, M. H., Farley, C. T., Full, R. J., Koehl, M. A. R., Kram, R. and Lehman, S.**  
622 (2000). How animals move: An integrative view. *Science* **288**, 100-106.  
623

624 **Doligalski, T. L., Smith, C. R. and Walker, J. D. A.** (1994). Vortex interactions with walls.  
625 *Annual Review of Fluid Mechanics* **26**, 573-616.  
626



- 627 **Earls, K. D.** (2000). Kinematics and mechanics of ground take-off in the starling *Sturnis*  
628 *Sturnus vulgaris* and the quail *Coturnix coturnix*. *Journal of Experimental Biology* **203**, 725-  
629 739.  
630
- 631 **Ellington, C. P.** (1984). The aerodynamics of hovering insect flight .4. Aerodynamic  
632 mechanisms. *Philosophical Transactions of the Royal Society of London Series B-Biological*  
633 *Sciences* **305**, 79-&.  
634
- 635 **Garner, J. P., Taylor, G. K. and Thomas, A. L. R.** (1999). On the origins of birds: the  
636 sequence of character acquisition in the evolution of avian flight. *Proceedings of the Royal*  
637 *Society of London Series B Biological Sciences* **266**, 1259-1266.  
638
- 639 **Gatesy, S. M. and Dial, K. P.** (1993). Tail muscle-activity patterns in walking and flying  
640 pigeons (*Columbia livia*). *Journal of Experimental Biology* **176**, 55-76.  
641
- 642 **Gatesy, S. M. and Dial, K. P.** (1996). Locomotor modules and the evolution of avian flight.  
643 *Evolution* **50**, 331-340.  
644
- 645 **Han, C. and Cho, J.** (2005). Unsteady trailing vortex evolution behind a wing in ground  
646 effect. *Journal of Aircraft* **42**, 429-434.  
647
- 648 **Hartley, R. and Sturm, P.** (1997). Triangulation. *Comput Vis Image Underst* **68**, 146–157.  
649
- 650 **Heppner, F. H. and Anderson, J. G. T.** (1985). Leg thrust important in flight take-off in  
651 pigeon. *Journal of Experimental Biology* **114**, 285-288.  
652
- 653 **Jackson, B. E. and Dial, K. P.** (2011). Scaling of mechanical power output during burst  
654 escape flight in the Corvidae. *Journal of Experimental Biology* **214**, 452-461.  
655
- 656 **Norberg, R. A. and Norberg, U. M.** (1971). Take-off and landing and flight speed during  
657 fishing flights of *Gavia stellata*. *Ornis Scandinavica* **2**, 55-67.  
658
- 659 **Ostrom, J. H.** (1974). Archaeopteryx and the origin of flight. *Quarterly Rev. Biol.* **49**, 27-47.  
660
- 661 **Padian, K.** (1987). A comparative phylogenetic and functional approach to the origin of  
662 vertebrate flight. Cambridge: Cambridge University Press.  
663
- 664 **Provini, P., Goupil, P., Hugel, V. and Abourachid, A.** (2012). Walking, paddling,  
665 waddling: 3D kinematics of Anatidae locomotion (*Callonetta leucophrys*). *Journal of*  
666 *Experimental Zoology* **317**, 275-282.

667

668 **R Development Core Team.** (2010). R: A Language and Environment for Statistical  
669 Computing. *R Foundation for Statistical Computing*.  
670

671 **Ros, I. G., Bassman, L. C., Badger, M. A., Pierson, A. N. and Biewener, A. A.** (2011).  
672 Pigeons steer like helicopters and generate down- and upstroke lift during low speed turns.  
673 *Proceedings of the National Academy of Sciences of the United States of America* **108**, 19990-  
674 19995.  
675

676 **Rüppell, G.** (1975). Bird flight. *Bird flight.*, 1-191.  
677

678 **Sane, S. P.** (2003). The aerodynamics of insect flight. *Journal of Experimental Biology* **206**,  
679 4191-4208.  
680

681 **Simpson, S. F.** (1983). The flight mechanism of the pigeon *Columbia livia* during take-off.  
682 *Journal of Zoology* **200**, 435-443.  
683

684 **Spedding, G. R.** (1993). On the significance of unsteady effects in the aerodynamic  
685 performance of flying animals. *Contemporary Mathematics* **141**, 401-419.  
686

687 **Spedding, G. R., Rosen, M. and Hedenstrom, A.** (2003). A family of vortex wakes  
688 generated by a thrush nightingale in free flight in a wind tunnel over its entire natural range of  
689 flight speeds. *Journal of Experimental Biology* **206**, 2313-2344.  
690

691 **Tobalske, B. W.** (2007). Biomechanics of bird flight. *Journal of Experimental Biology* **210**,  
692 3135-3146.  
693

694 **Tobalske, B. W. and Dial, K. P.** (2000). Effects of body size on take-off flight performance  
695 in the Phasianidae (Aves). *Journal of Experimental Biology* **203**, 3319-3332.  
696

697 **Tobalske, B. W. and Dial, K. P.** (2007). Aerodynamics of wing-assisted incline running in  
698 birds. *Journal of Experimental Biology* **210**, 1742-1751.  
699

700 **Tobalske, B. W. and Biewener, A. A.** (2008). Contractile properties of the pigeon  
701 supracoracoideus during different modes of flight. *Journal of Experimental Biology* **211**, 170-  
702 179.  
703

704 **Tobalske, B. W., Peacock, W. L. and Dial, K. P.** (1999). Kinematics of flap-bounding flight  
705 in the zebra finch over a wide range of speeds. *Journal of Experimental Biology* **202**, 1725-  
706 1739.

707

708 **Tobalske, B. W., Hedrick, T. L. and Biewener, A. A.** (2003). Wing kinematics of avian  
 709 flight across speeds. *Journal of Avian Biology* **34**, 177-184.

710

711 **Tobalske, B. W., Altshuler, D. L. and Powers, D. R.** (2004). Take-off mechanics in  
 712 hummingbirds (Trochilidae). *Journal of Experimental Biology* **207**, 1345-1352.

713

714 **Tobalske, B. W., Altshuler, D. L., Powers, D. R.** (2004). Take-off mechanics in  
 715 hummingbirds (Trochilidae). *Journal of Experimental Biology* **207**, 1345-1352.

716

717 **Vogel, S.** (1994). Life in moving fluids: the physical biology of flow., Princeton, New Jersey.

718

719 **Warrick, D. R., Tobalske, B. W. and Powers, D. R.** (2005). Aerodynamics of the hovering  
 720 hummingbird. *Nature* **435**, 1094-1097.

721

722

## 723 Table

724 Table 1: Morphometric parameters of zebra finch (*Taeniopygia guttata*) and diamond dove

725 (*Geopelia cuneata*)

| Species      | Wing Length<br>(cm) | Body<br>Width<br>(cm) | Wing<br>Area<br>(cm <sup>2</sup> ) | Wing<br>Chord<br>(cm) | Aspect<br>Ratio | Tarsometatarsus<br>Length (cm) |
|--------------|---------------------|-----------------------|------------------------------------|-----------------------|-----------------|--------------------------------|
| Zebra Finch  | 7.5 ± 0.4           | 2.4 ± 0.2             | 27.2 ± 2.3                         | 4.1 ± 0.2             | 4.2 ± 0.04      | 1.6 ± 0.03                     |
| Diamond Dove | 12.0 ± 0.4          | 2.8 ± 0.2             | 56.8 ± 4.8                         | 5.5 ± 0.1             | 4.9 ± 0.05      | 1.7 ± 0.1                      |

726

727

728 Table 2: Aerodynamic parameters for the first three wingbeats after *LO* in zebra finch

729 (*Taeniopygia guttata*) (A) and diamond dove (*Geopelia cuneata*) (B). Diamond dove data for

730 wingbeat three come from another experiment with the same methods but where birds were

731 using level flight instead of climbing flight.

## 732 A

|                                       | zebra finch ( <i>Taeniopygia guttata</i> ) |             |             |
|---------------------------------------|--------------------------------------------|-------------|-------------|
|                                       | Wingbeat 1                                 | Wingbeat 2  | Wingbeat 3  |
|                                       | Mean ± s.d.                                | Mean ± s.d. | Mean ± s.d. |
| A (cm <sup>2</sup> )                  | 163.64±17.7                                | 193.82±22.3 | 177.88±6.5  |
| Γ, m <sup>2</sup> s <sup>-1</sup> (+) | 0.35±0.1                                   | 0.42±0.2    | 0.5±0.02    |
| Γ, m <sup>2</sup> s <sup>-1</sup> (-) | -0.36±0.1                                  | -0.54±0.1   | -0.47±0.1   |

|                                                    |            |            |             |
|----------------------------------------------------|------------|------------|-------------|
| S (mm)                                             | 0.01±0.001 | 0.01±0.001 | 0.01±0.001  |
| $V_{vort}$ (m.s <sup>-1</sup> )                    | 0.59±0.13  | 0.68±0.2   | 0.79±0.05   |
| $t_o$ (ms)                                         | 44.94±5.7  | 39.73±4.4  | 39.0±3.8    |
| Angle of induced velocity to horizontal (degrees)  | 63.57±6.7  | 60.19±11.8 | 54.6±4.9    |
| Magnitude of induced velocity (m.s <sup>-1</sup> ) | 3.9±1.9    | 5.1±2.3    | 5.1±1.6     |
| $V_{wtip}$ (m.s <sup>-1</sup> )                    | 6.0±1.5    | 9.3±0.4    | 9.8±0.5     |
| $D_{wake}$ (m)                                     | -          | 0.15±0.01  | 0.16 ± 0.01 |
| $J_K$                                              | 0.32±0.10  | 0.20±0.02  | 0.20±0.03   |
| $J_{PIV}$                                          | -          | 0.37±0.04  | 0.44±0.03   |

## B

|                                                    | diamond dove ( <i>Geopelia cuneata</i> ) |             |              |
|----------------------------------------------------|------------------------------------------|-------------|--------------|
|                                                    | Wingbeat 1                               | Wingbeat 2  | Wingbeat 3 * |
|                                                    | Mean ± s.d.                              | Mean ± s.d. | Mean ± s.d.  |
| A (cm <sup>2</sup> )                               | 461.34±40.9                              | 462.66±33.4 | 399.2±40.4   |
| $\Gamma$ , m <sup>2</sup> s <sup>-1</sup> (+)      | 0.58±0.2                                 | 0.71±0.1    | 0.46±0.1     |
| $\Gamma$ , m <sup>2</sup> s <sup>-1</sup> (-)      | -0.76±0.3                                | -0.79±0.1   | 0.57±0.1     |
| S (mm)                                             | 0.01±0.001                               | 0.01±0.001  | 0.01±0.001   |
| $V_{vort}$ (m s <sup>-1</sup> )                    | 0.87±0.14                                | 1.22±0.05   | 1.22±0.05    |
| $t_o$ (ms)                                         | 64.0±6.4                                 | 65.18±5.2   | 67.3±2.3     |
| Angle of induced velocity to horizontal (degrees)  | 54.92±10.1                               | 69.59±6.1   | 70.6±10.1    |
| Magnitude of induced velocity (m.s <sup>-1</sup> ) | 4.37±1.3                                 | 5.22±1.3    | 4.0±0.8      |
| $V_{wtip}$ (m.s <sup>-1</sup> )                    | 9.1±1.7                                  | 11.4±0.6    | 12.6±0.6     |
| $D_{wake}$ (m)                                     | -                                        | 0.25±0      | 0.20±0.01    |
| $J_K$                                              | 0.20±0.05                                | 0.17±0.01   | 0.19±0.02    |
| $J_{PIV}$                                          | -                                        | 0.24±0.01   | 0.30±0.02    |

## Figures

Fig. 1) A and C, velocity and B and D, acceleration, calculated from the displacement of the geometric center of the animal during take-off in zebra finch (*Taeniopygia guttata*), A and B and diamond dove (*Geopelia cuneata*), C and D. N=7 birds in zebra finch and N=3 in diamond dove with 5 trials within each bird. Envelopes illustrate the variability, defined as the maximum-minimum range across all trials. E) Sketch of the upstroke/downstroke succession during take-off.

In orange the horizontal component, in green the vertical component, in blue, the resultant

( $V_{RK}$ ) and ( $\dot{V}_{RK}$ )

745 USDS: upstroke/downstroke transition; DSUS: downstroke/upstroke transition; LO: lift-off,  
746 FW: first use of the wings.

747

748 Fig. 2) Resultant acceleration ( $\vec{V}_{RK}$ ) and resultant velocity ( $\vec{V}_{RK}$ ), calculated from the  
749 kinematic data (in blue) and from the force measurements ( $\vec{V}_{RFP}$  and  $\vec{V}_{RFP}$ , in pink) in zebra  
750 finch (*Taeniopygia guttata*) (A) and diamond dove (*Geopelia cuneata*) (B).

751

752 Fig. 3) Particle image velocimetry. A and C, velocity vectors, expressed relative to average  
753 velocity, and with background vorticity ( $\omega$ ), B and D, Streamlines associated with the vector  
754 field. Broken lines indicate regions sampled for  $\omega$  (red=starting vortex, blue=ending vortex)  
755 in zebra finch (*Taeniopygia guttata*) (A and B) and diamond dove (*Geopelia cuneata*) (C and  
756 D). Grey circle highlights the location of the take-off perch.

757

758 Fig. 4) Category plot of the acceleration produced during the first three wingbeats in zebra  
759 finch (*Taeniopygia guttata*) (A) and in diamond dove (*Geopelia cuneata*) (B). In blue,  
760 resultant acceleration calculated from kinematic data ( $\vec{V}_{RK}$ ) for 5 trials in N=7 zebra finches  
761 and N=3 diamond doves during the first upstroke and during each wingbeat. In pink, resultant  
762 acceleration calculated from the force data ( $\vec{V}_{RFP}$ ) for 5 trials in N=7 zebra finches and N=3  
763 diamond doves during the first upstroke and first wingbeat. In orange, resultant acceleration  
764 calculated from PIV data ( $\vec{V}_{PIV}$ ) with N=4 zebra finches and 37 wingbeats and N=3 diamond  
765 doves and 42 wingbeats.

766

## 767 **Electronic supplementary material**

768 Supplemental Figure S1: Drawing of a zebra finch (*Taeniopygia guttata*) with the position of  
769 the digitized landmarks and the edge of the animal used to calculate the position of the

770 geometric center. The position of the center of mass estimated using the multiple suspension  
771 method is represented by a circle.

772

773 Supplementary Figure S2: A) Vertical trajectory of the center of mass over time in zebra finch  
774 (*Taeniopygia guttata*) (purple) and diamond dove (*Geopelia cuneata*) (pink) and B) Body  
775 orientation in zebra finch (purple) and diamond dove (pink). Time zero is at lift-off.

# Zebra finch

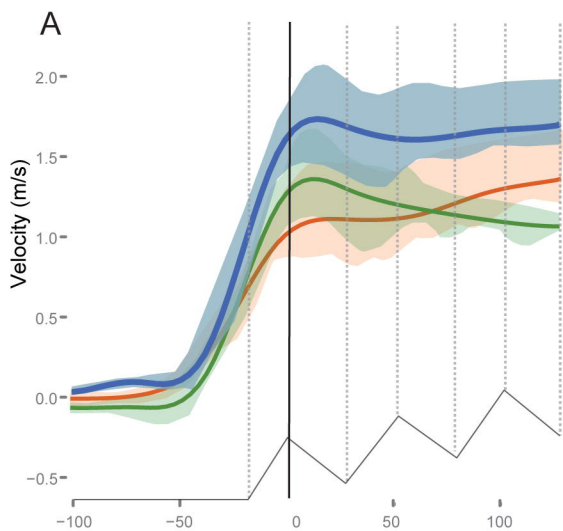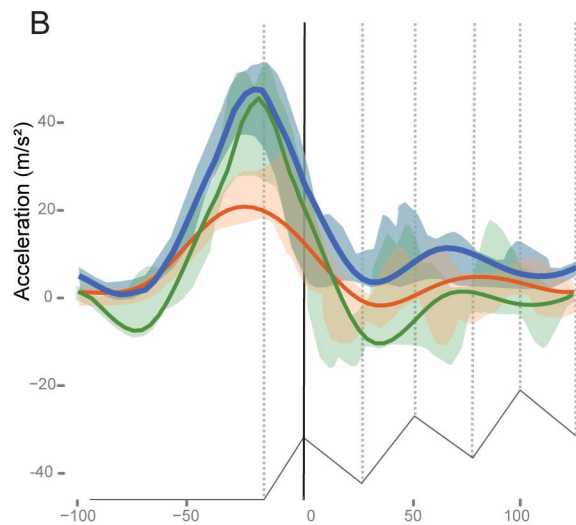

# Diamond dove

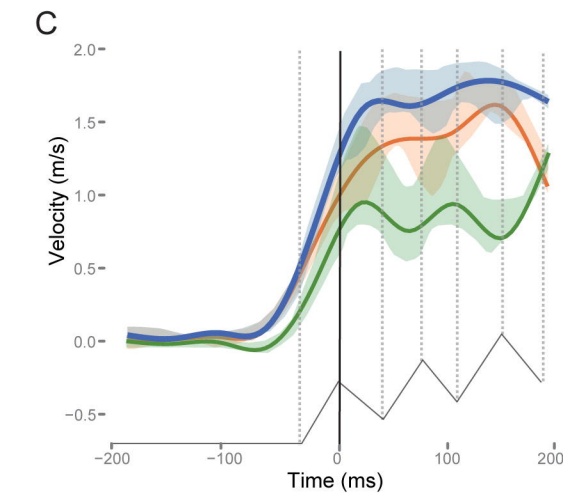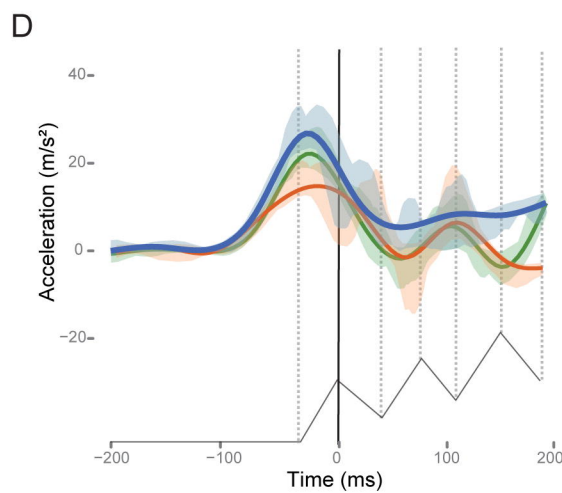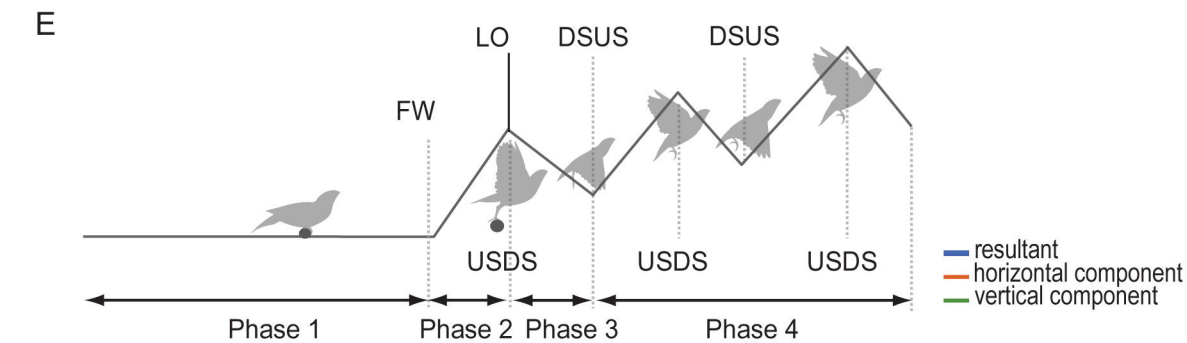

# Zebra finch

A

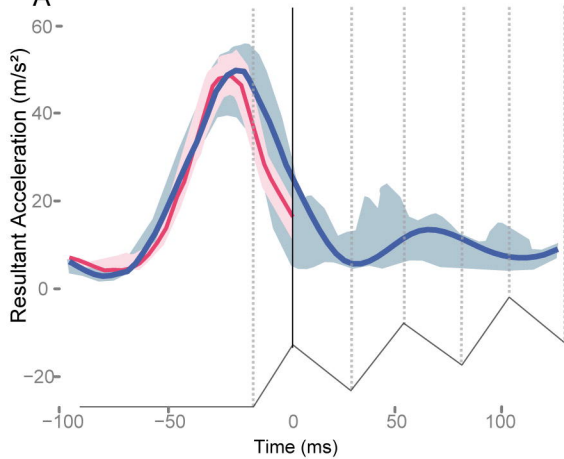

B

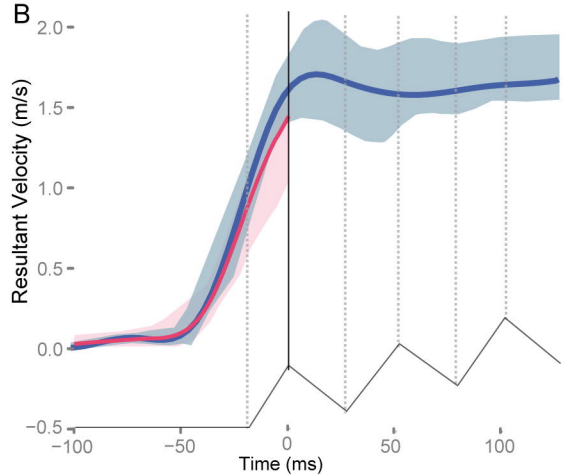

# Diamond dove

C

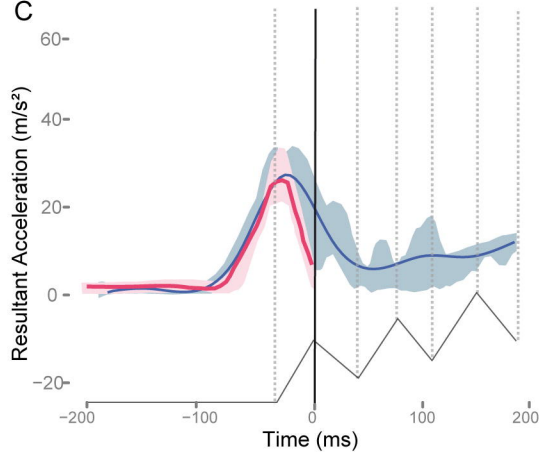

D

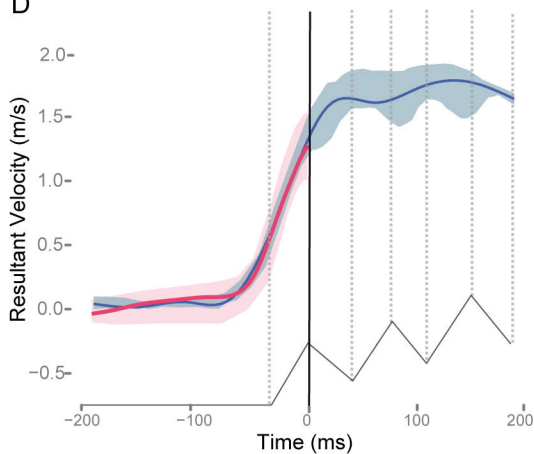

— resultant component (force data)  
— resultant component (kinematic data)



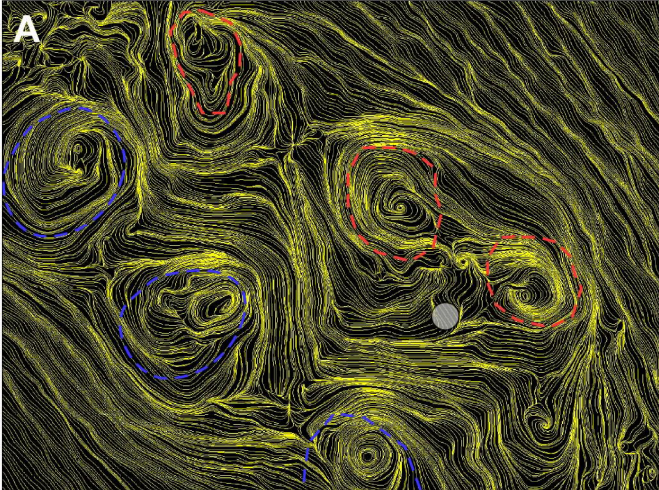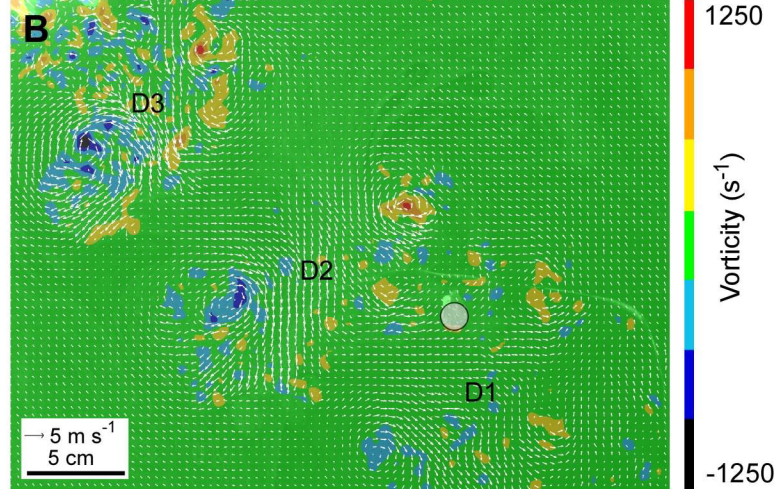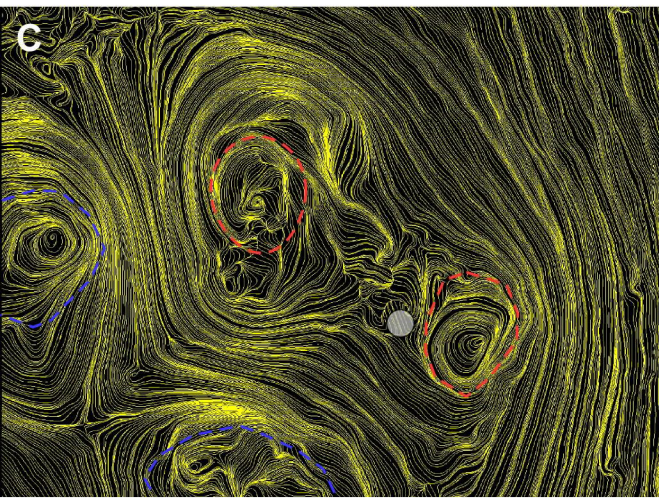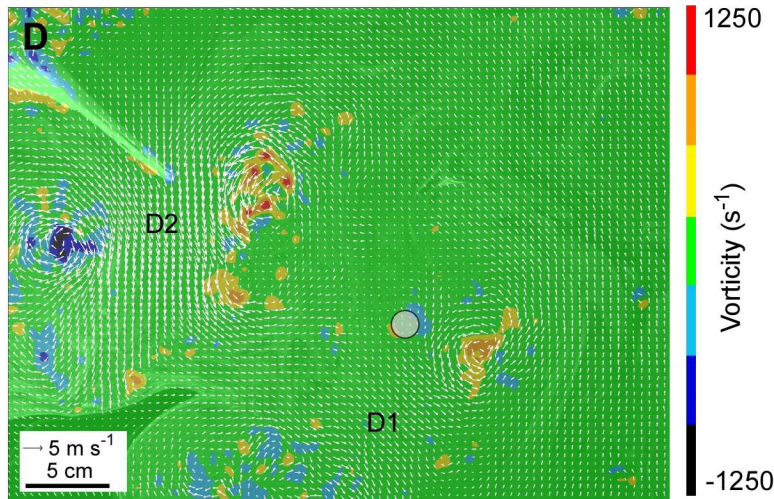

**A. Zebra finch**

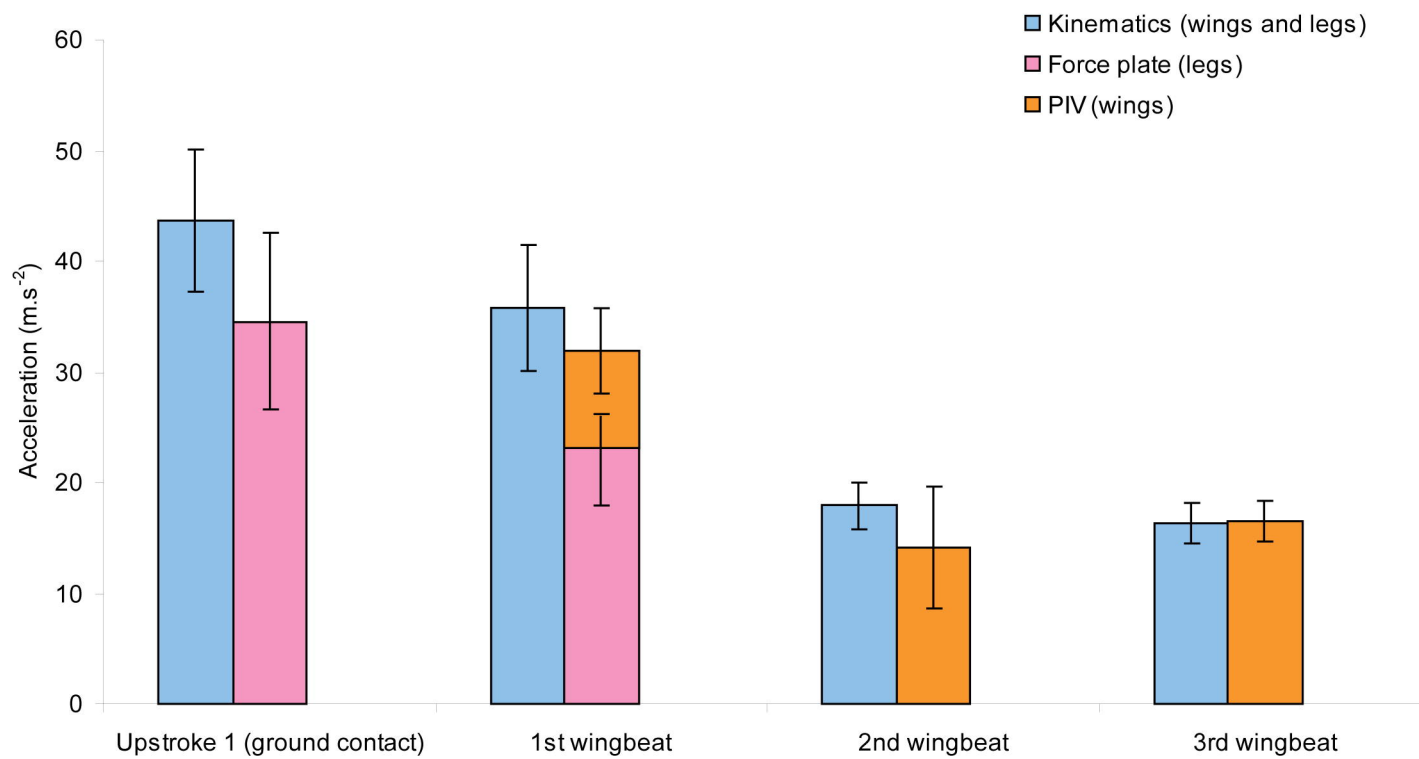

**B. Diamond dove**

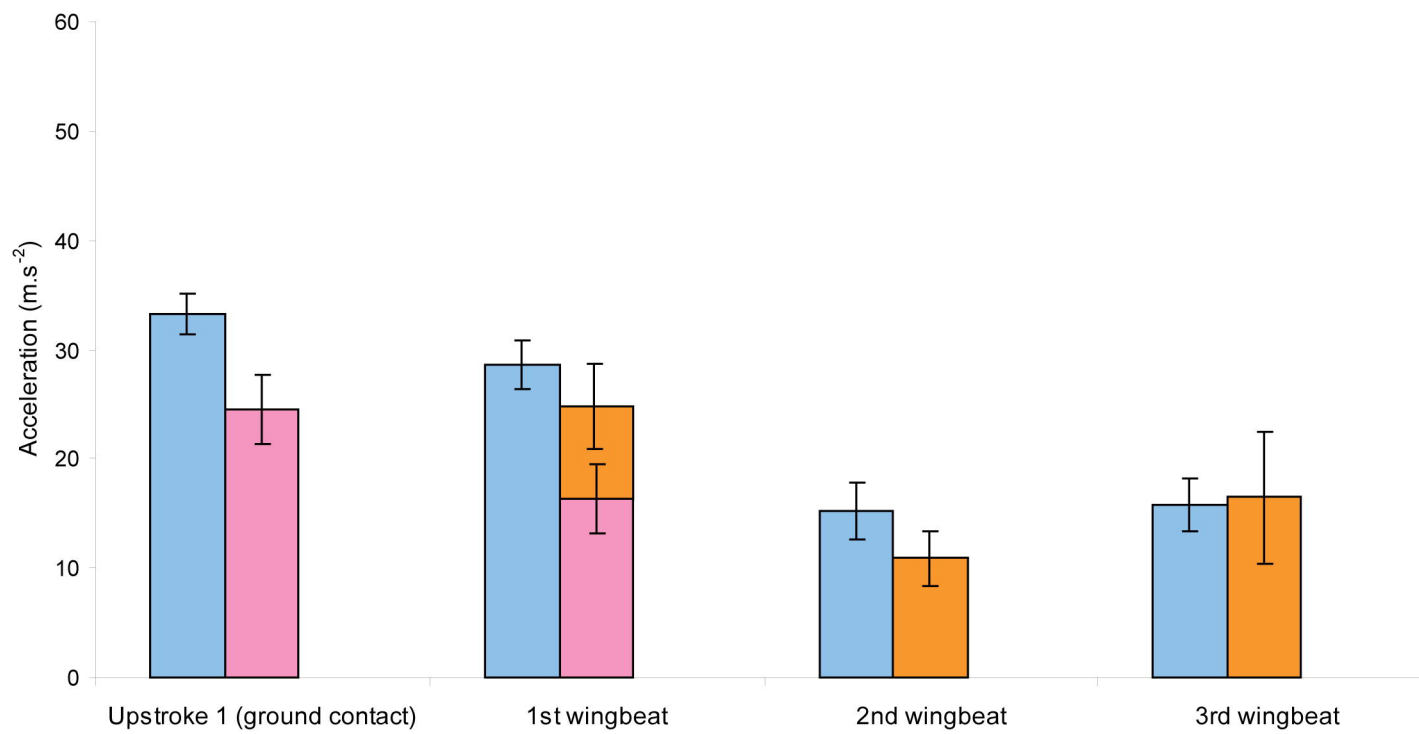

Source: https://cob.silverchair.com/jeb/article-pdf/doi/10.1242/jeb.074484/2036381/jeb_074484.pdf
